# Supplementary material for: Re-Establishment of the Genus Ania Lindl. (Orchidaceae)
Source: PubMed Central journal article supplement (PMC4105443; doi:10.1371/journal.pone.0103129), 2014-07-21
Supplement: pone.0103129.s001.pdf [file pone.0103129.s001.pdf]

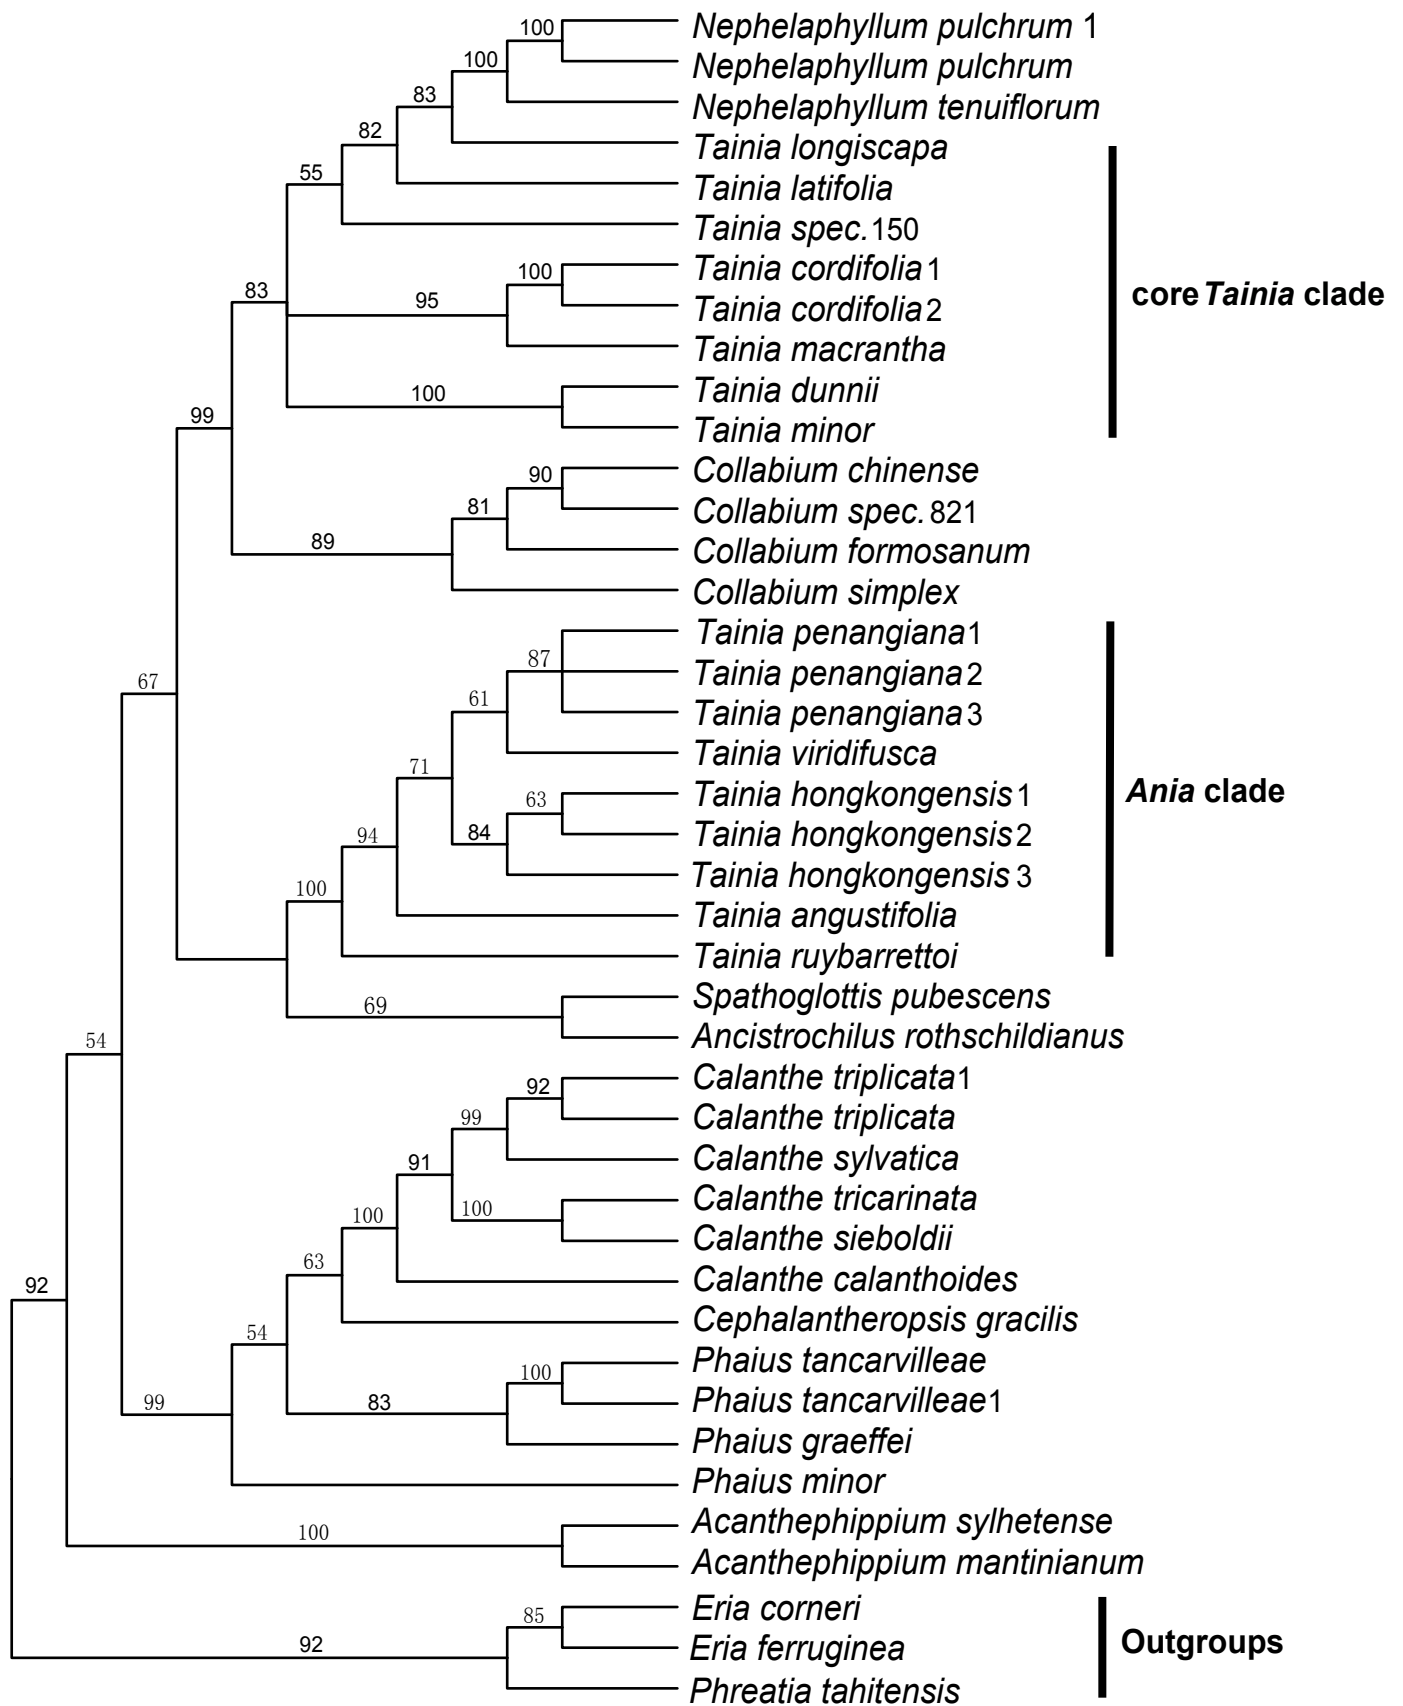

**Fig. S1.** Strict consensus tree of 3 equally parsimonious trees inferred using nr DNA ITS dataset to show the placement of *Ania* and the core *Tainia*. Bootstrap values are indicated above.
