# Supplementary material for: Re-Establishment of the Genus Ania Lindl. (Orchidaceae)
Source: PubMed Central journal article supplement (PMC4105443; doi:10.1371/journal.pone.0103129), 2014-07-21
Supplement: pone.0103129.s003.pdf [file pone.0103129.s003.pdf]

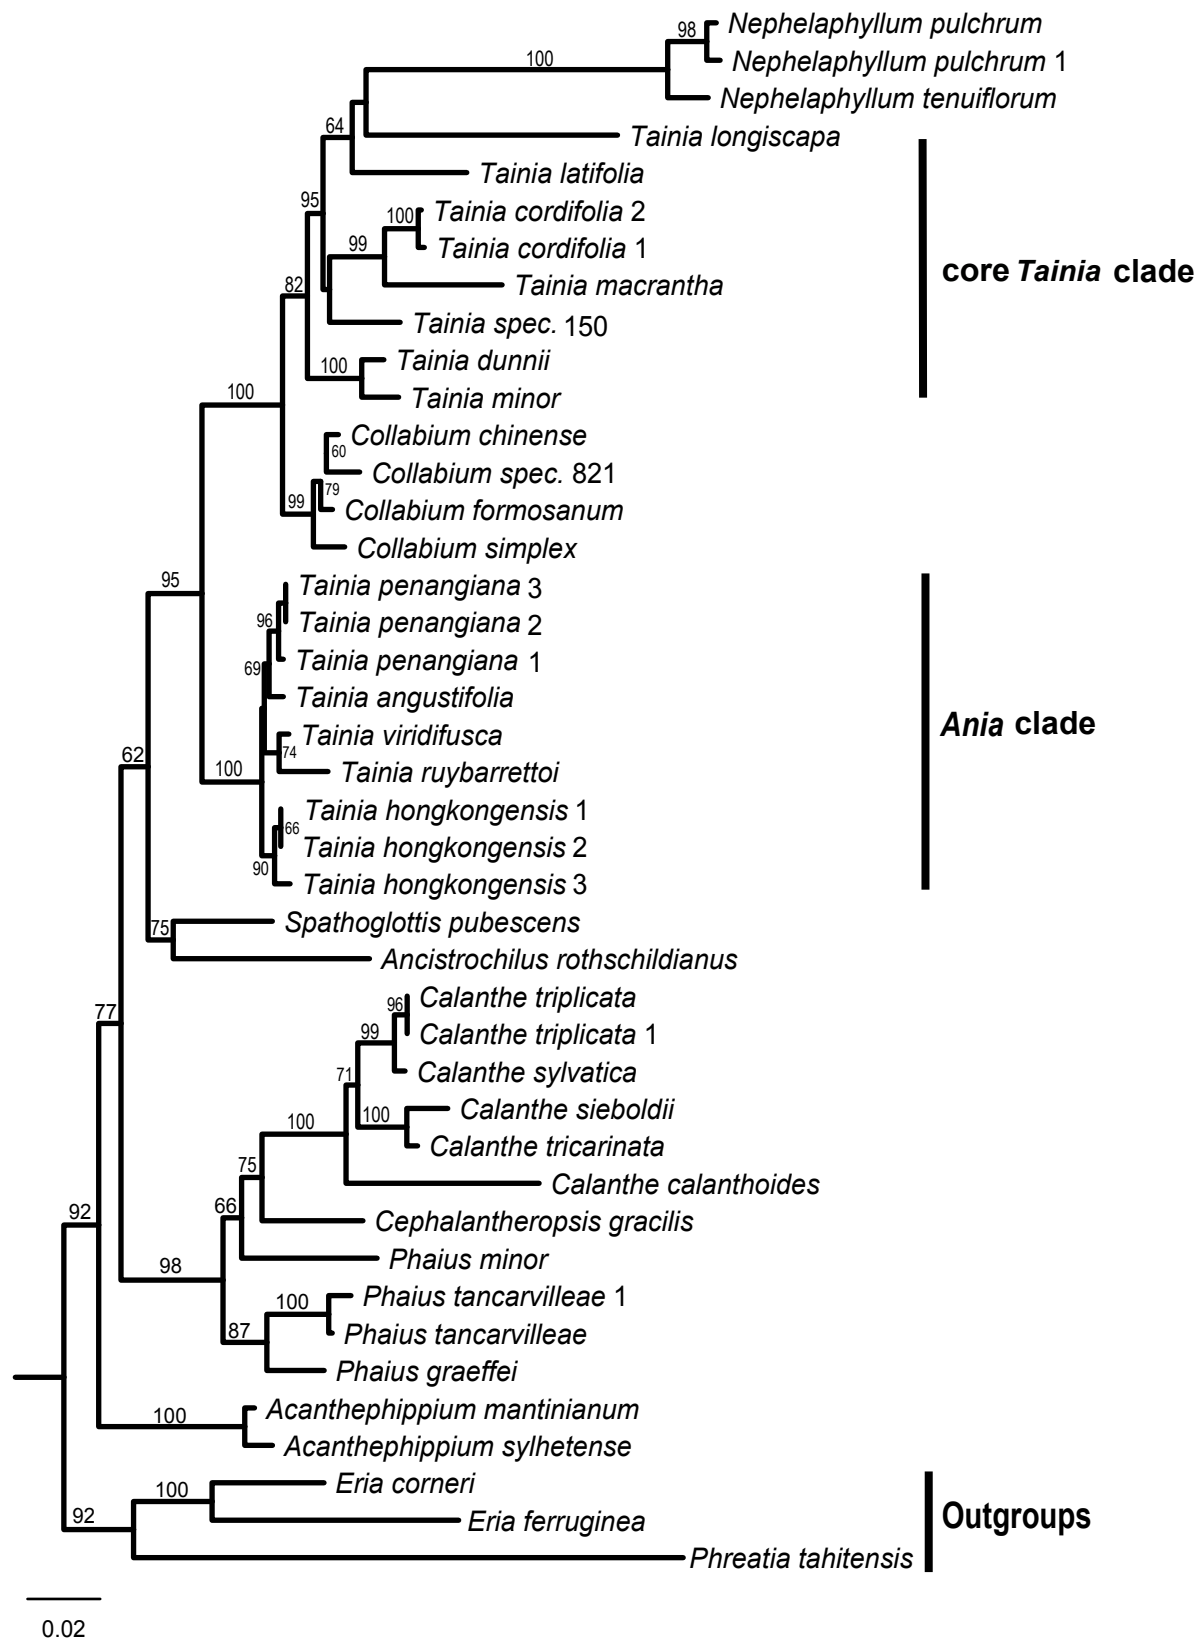

**Fig.S3.** Maximum likelihood phylogeny of the combined datasets (ITS and *trnL* intron) with bootstrap values on the branches (> 50%) to show the placement of *Ania* and the core *Tainia*.
